# Supplementary material for: CO 2 emissions from peat-draining rivers regulated by water pH
Source: Copernicus journal article supplement (doi:10.5194/bg-19-2855-2022), 2022-06-13
Supplement: Supplementary file 1 [file bg-19-2855-2022-supplement.zip]

Archive with 3 entries (3 files):
- DataTable.xlsx
- bg-19-2855-2022-supplement-title-page.pdf
- Least_Squares_Code.py
