# Supplementary material for: CO 2 emissions from peat-draining rivers regulated by water pH
Source: Copernicus journal article supplement (doi:10.5194/bg-19-2855-2022), 2022-06-13
Supplement: Supplementary file 1 [file bg-19-2855-2022-supplement.zip › bg-19-2855-2022-supplement-title-page.pdf]

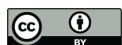

## *Supplement of*

# **CO<sub>2</sub> emissions from peat-draining rivers regulated by water pH**

**Alexandra Klemme et al.**

*Correspondence to:* Alexandra Klemme (aklemme@uni-bremen.de)

- bg-19-2855-2022-supplement-title-page.pdf
- DataTable.xlsx
- Least\_Squares\_Code.py

The copyright of individual parts of the supplement might differ from the article licence.
