# Supplementary material for: CO 2 emissions from peat-draining rivers regulated by water pH
Source: Copernicus journal article supplement (doi:10.5194/bg-19-2855-2022), 2022-06-13
Supplement: Supplementary file 1 [file bg-19-2855-2022-supplement.zip › DataTable.xlsx]

## Sheet: Average River Data
River	peat	peat_err	T(C)	T_err	pH	pH_err	DOC(uM)	DOC_err	CO2(uM)	CO2_err	O2(uM)	O2_err
Simunjan_high	42.9	0.7	27.85	0.298077	4.7271	0.300297	8365.6	1693.52	474.91	96.53	95.7625	20
Maludam	90.7	1.5	26	0.511	3.809	0.16	4030.6	804.948	281.037	30.441	55.393	36.426
Sebuyau	60.7	1	27.83	0.58	4.232	0.235	3026.22	1047.27	278.513	33.781	60.79	26.282
Simunjan	42.9	0.7	28.18	0.599	5.324	0.353	1533.33	558.617	247.695	53.689	106.732	21.313
Rajang	7.7	0.1	28.75	1.155	6.703	0.122	169.25	31.742	92.059	15.976	190.078	25.971
Musi	4	0.1	30.63	0.257	6.86	0.257	243.9	4.9	128.337	20	149.433	43.033
Batang Hari	5.4	0.1	30.03	0.06	7.07	0.3	321.367	3.533	71.947	20	162.8	20
Indragiri	11.4	0.2	31.47	0.087	6.3	0.3	692.067	4.7	170.719	20	89.067	20
Siak	25.9	0.4	29.95	0.212	5.13	0.495	1829.01	601.441	255.446	20.948	53.027	21.815
Mandau	48.1	0.8	30.27	2.313	4.767	0.733	2483.93	669.192	nan	nan	62.757	25.1
Tapung Kanan	53.4	0.9	30.27	0.956	5.79	0.654	1526.35	169.388	nan	nan	85.491	27.42
Tapung Kiri	3.9	0.1	30.84	2.188	6.303	0.464	640.006	162.097	nan	nan	131.779	50
Rokan	18.6	0.3	28.88	1.05	6.51	0.109	780.5	50	nan	nan	114.07	22.0247
Kampar	27.8	0.5	29.37	0.703	6.43	0.386	1280.5	50	nan	nan	97.923	43.017

## Sheet: Average Campaign Data
River	Year	Month	peat (%)	peat_err	T(C)	T_err	pH	pH_err	DOC(uM)	DOC_err	CO2(uM)	CO2_err	O2(uM)	O2_err
Maludam_14	2014	3	90.7	1.5	26.06	0.72	3.76	0.25	4146.1	890.8	256.94	29.78	46.27	11.01
Maludam_15	2015	3	90.7	1.5	25.58	0.15	3.77	0.02	3552.3	165.1	279.07	4.96	31.96	5.66
Maludam_16	2016	1	90.7	1.5	26.26	0.74	3.82	0.24	5548	360.6	282.34	15.85	119.38	7.38
Maludam_171	2017	3	90.7	1.5	26.22	0.2	3.72	0.04	3165.5	178	257.88	28.45	43.83	9.11
Maludam_172	2017	7	90.7	1.5	25.87	0.25	3.98	0.11	3741.1	131.9	328.95	40.85	35.52	4.3
Sebuyau_15	2015	3	60.7	1	27.7	0.4	4.22	0.07	2028.5	207.3	234.05	15.63	44.78	12.93
Sebuyau_16	2016	1	60.7	1	28.11	0.8	4.03	0.28	4574.9	334.3	289.25	30.35	91.54	30.88
Sebuyau_171	2017	3	60.7	1	27.73	0.17	4.48	0.24	2799	852.3	297.53	14.67	52.5	13.3
Sebuyau_172	2017	7	60.7	1	27.53	0.67	4.21	0.17	2607.6	363.9	294.37	22.62	47.32	15.48
Simunjan_15	2015	3	42.9	0.7	28.57	0.39	5.24	0.29	1646.3	743	268.28	71.12	98.84	9.52
Simunjan_16	2016	1	42.9	0.7	27.69	0.16	4.45	0.28	9367.4	1227.6	nan	nan	139.13	8.77
Simunjan_171	2017	3	42.9	0.7	28	0.44	5	0.32	7363.8	2159.4	474.91	96.53	52.4	18.56
Simunjan_172	2017	7	42.9	0.7	27.8	0.36	5.41	0.27	1420.4	338	227.11	15.91	114.63	14.28
Rajang_161	2016	1	7.7	0.1	27.94	0.16	6.61	0.09	nan	nan	92.23	20	202.79	22.99
Rajang_162	2016	8	7.7	0.1	29.57	0.2	6.8	0.04	nan	nan	91.89	7.56	177.37	20
Rajang_171	2017	2	7.7	0.1	nan	nan	nan	nan	169.3	31.7	nan	nan	nan	nan
Musi_09	2009	10	4	0.1	30.8	0.11	nan	nan	223.3	4.5	99.08	8.6	158.4	24.9
Musi_12	2012	10	4	0.1	31.4	0.09	6.86	0.25	264.5	5.3	nan	nan	137.1	48.3
Musi_13	2013	4	4	0.1	29.7	0.57	nan	nan	nan	nan	157.6	26.81	152.8	55.9
Batanghari_09	2009	10	5.4	0.1	29.8	0.08	7.07	0.01	363	2.7	71.95	0.54	162.8	1.3
Batanghari_12	2012	10	5.4	0.1	29.5	0.05	nan	nan	286.9	2.8	nan	nan	nan	nan
Batanghari_13	2013	4	5.4	0.1	30.8	0.05	nan	nan	314.2	5.1	nan	nan	nan	nan
Indragiri_09	2009	10	11.4	0.2	29.8	0	nan	nan	774	5.1	158.13	0	128.4	0
Indragiri_13	2013	4	11.4	0.2	32.3	0.13	6.3	0.05	651.1	4.5	177.01	5.81	69.4	4
Siak_041	2004	3	25.9	0.4	nan	nan	nan	nan	1866	-	nan	nan	nan	nan
Siak_042	2004	9	25.9	0.4	nan	nan	nan	nan	2195	-	nan	nan	nan	nan
Siak_05	2005	8	25.9	0.4	nan	nan	nan	nan	2247	-	nan	nan	nan	nan
Siak_061	2006	3	25.9	0.4	nan	nan	nan	nan	1613	-	nan	nan	nan	nan
Siak_062	2006	11	25.9	0.4	nan	nan	nan	nan	1793	-	nan	nan	nan	nan
Siak_09	2009	10	25.9	0.4	29.8	0	4.78	0.03	2453	49.1	240.63	1.12	17.1	1.2
Siak_13	2013	4	25.9	0.4	30.1	0.57	5.48	0.2	636.1	3.9	270.26	16.87	35.3	18.3
Tapung_Kanan_041	2004	3	53.4	0.9	30.5	0.1	5.45	0.15	1461.3	428.7	nan	nan	56.25	3.13
Tapung_Kanan_042	2004	9	53.4	0.9	31.08	1.26	6.77	0.27	1765.1	46.5	nan	nan	89.58	29.57
Tapung_Kanan_05	2005	8	53.4	0.9	28.88	0.38	5.64	0.4	1399.1	238.3	nan	nan	110.63	6.43
Tapung_Kanan_06	2006	3	53.4	0.9	30.6	1	5.47	0.2	1371.8	146.2	nan	nan	nan	nan
Tapung_Kiri_041	2004	3	3.9	0.1	31.2	1	6.67	0.23	653.3	13.6	nan	nan	140.63	20
Tapung_Kiri_042	2004	9	3.9	0.1	29.9	1.9	6.73	0.46	602.7	53.4	nan	nan	159.38	20
Tapung_Kiri_05	2005	8	3.9	0.1	28.57	0.61	5.63	0.89	786.9	346.8	nan	nan	131.78	20
Tapung_Kiri_06	2006	3	3.9	0.1	30.2	1	5.98	0.39	537	250	nan	nan	nan	nan
Mandau_041	2004	3	48.1	0.8	29.24	0.68	4.58	0.18	3180.2	311.1	nan	nan	33.13	7.55
Mandau_042	2004	9	48.1	0.8	29.5	0.5	5.73	1.15	2496.9	558	nan	nan	114.06	60.94
Mandau_05	2005	8	48.1	0.8	28.65	0.73	4.24	0.4	2426	1059.7	nan	nan	79.69	12
Rokan_06	2006	4	18.4	0.3	28.4	0.42	6.53	0.1	825.5	50.1	nan	nan	125	2.55
Rokan_08	2008	3	18.4	0.3	30.4	1	6.41	0.16	911.5	14.1	nan	nan	nan	nan
Kampar_06	2006	4	27.8	0.4	29.4	0.91	6.33	0.44	1061.6	338.8	nan	nan	114.06	37.57
Kampar_08	2008	11	27.8	0.4	29.15	0.7	5.7	0.35	977.9	259.5	nan	nan	140.7	14.15
